# Supplementary material for: ARTEMIS: a pilot study comparing AI-based and expert therapeutic decisions in simulated clinical cases of neuroendocrine neoplasms
Source: Springer Nature journal article supplement (doi:10.1038/s41746-025-02274-x), 2025-12-23
Supplement: MOESM1 [file 41746_2025_2274_MOESM1_ESM%20%281%29.pdf]

**Supplementary Information**

**Table of Contents**

**Table S1. Subgroup analyses ..... p.3**

**Table S2. Sensitivity analyses ..... p.4**

**Table S1. Univariate associations between clinical variables and AI–expert concordance**

| Variable                     | Entropy correlation<br>r (95% CI)       | p-value      | AC1 correlation<br>r (95% CI)              | p-value      |
|------------------------------|-----------------------------------------|--------------|--------------------------------------------|--------------|
| Age                          | 0.037<br>(-0.077 to 0.150)              | 0.523        | -0.126<br>(-0.539 to 0.335)                | 0.596        |
| ECOG                         | 0.000<br>(-0.113 to 0.114)              | 0.994        | –                                          | –            |
| Stage                        | 0.045<br>(-0.068 to 0.158)              | 0.433        | –                                          | –            |
| Treatment line               | -0.025<br>(-0.138 to 0.089)             | 0.669        | -0.033<br>(-0.469 to 0.415)                | 0.889        |
| <b>Grade</b>                 | <b>0.510</b><br><b>(0.073 to 0.783)</b> | <b>0.026</b> | <b>-0.573</b><br><b>(-0.815 to -0.161)</b> | <b>0.010</b> |
| Somatostatin receptor status | Kruskal–Wallis                          | 0.195        | Kruskal–Wallis                             | 0.734        |
| Primary tumour site          | Kruskal–Wallis                          | 0.577        | Kruskal–Wallis                             | 0.192        |
| <b>Uncertainty (experts)</b> | 0.429<br>(-0.017 to 0.732)              | 0.059 †      | <b>-0.595</b><br><b>(-0.821 to -0.207)</b> | <b>0.006</b> |

**Abbreviations:** Pearson correlation for continuous variables, Kruskal–Wallis test for categorical. † = trend ( $0.05 \leq p < 0.10$ ). Bold values = statistically significant ( $p < 0.05$ ).

**Table S2. Sensitivity analysis: intra-run reproducibility of AI models and inter-expert variability (Bootstrap analysis, 95% CI)**

| <b>Outcome</b>      | <b>Model</b> | <b>Mean AC1 (95% CI)</b> | <b>Mean agreement % (95% CI)</b> |
|---------------------|--------------|--------------------------|----------------------------------|
| <b>Therapy</b>      | GPT          | 0.843 (0.687–0.961)      | 80.1 (60–95)                     |
|                     | GPTs         | 0.766 (0.613–0.919)      | 69.9 (50–90)                     |
|                     | RAG          | 1.000 (1.000–1.000)      | 100.0 (100–100)                  |
|                     | Experts      | 0.427 (0.294–0.561)      | 6.0 (0.0–17.6)                   |
| <b>Tests</b>        | GPT          | 0.487 (0.270–0.696)      | 45.2 (25–70)                     |
|                     | GPTs         | 0.370 (0.163–0.574)      | 34.5 (15–55)                     |
|                     | RAG          | 0.946 (0.817–1.000)      | 95.0 (85–100)                    |
|                     | Experts      | 0.443 (0.313–0.575)      | 9.9 (0.0–25.0)                   |
| <b>Uncertainty</b>  | GPT          | 0.835 (0.642–0.966)      | 79.8 (60–95)                     |
|                     | GPTs         | 1.000 (1.000–1.000)      | 100.0 (100–100)                  |
|                     | RAG          | 0.875 (0.670–1.000)      | 90.3 (75–100)                    |
|                     | Experts      | 0.239 (0.103–0.394)      | 5.1 (0.0–15.8)                   |
| <b>Completeness</b> | GPT          | 1.000 (1.000–1.000)      | 100.0 (100–100)                  |
|                     | GPTs         | 1.000 (1.000–1.000)      | 100.0 (100–100)                  |
|                     | RAG          | 1.000 (1.000–1.000)      | 100.0 (100–100)                  |
|                     | Experts      | 0.164 (0.095–0.231)      | 0.0 (0.0–0.0)                    |
| <b>Cost</b>         | GPT          | 0.287 (0.126–0.451)      | 20.2 (5–40)                      |
|                     | GPTs         | 0.309 (0.151–0.471)      | 20.2 (5–40)                      |
|                     | RAG          | 0.925 (0.811–1.000)      | 90.3 (75–100)                    |
|                     | Experts      | 0.323 (0.247–0.403)      | 0.0 (0.0–0.0)                    |

**Abbreviations:** Mean AC1 and mean agreement with 95% bootstrap confidence intervals. AI rows report intra-run reproducibility; Expert rows report inter-expert variability.
